# Supplementary material
Source: PubMed Central journal article supplement (PMC2899933)
Supplement: pp.110.156430_1.pdf [file pp.110.156430_1.pdf]

## List of supplementary data

**Figure S1** Amino acid alignment for *GiNT*

**Figure S2** Amino acid alignment and phylogenetic analysis for *GiGS1* and *GiGS2*

**Figure S3** Amino acid alignment for *GiGluS*

**Figure S4** Amino acid alignment for *GiCPS*

**Figure S5** Amino acid alignment for *GiASS*

**Figure S6** Amino acid alignment for *GiAL*

**Figure S7** Amino acid alignment and phylogenetic analysis for *GiCAR1*

**Figure S8** Amino acid alignment for *GiOAT1*

**Figure S9** Amino acid alignment for *GiODC*

**Figure S10** Amino acid alignment for *GiURE*

**Figure S11** Western blot of the expressed proteins in yeast

**Table S1** Primers for gene cloning

**Table S2** Yeast strains for functional complementation

**Table S3** Primers for real time PCR

```

GiNT
A. nidulans      1  -----MDFAKLLVASPEVMPNNRKA LTI PV LNP----- FNT
S. lycopersicum 1  MADVEGSPGSSMHGVTGREPVLA FSVAS PMVPTDTS AKFSVPVDTEHKAKQFKFYSFSKP

GiNT
A. nidulans      32  YGRVFFFSWFGFMLAFLSWYAFP LLTVTI RDDLMSQTQ IANSNII ALLATLLVRLICG
S. lycopersicum 61  HGLTFQLSWISFFTCFVSTFAAA PLVP -IIRDNLN LTKMDVGNAGVASVSGSILSRLTMG

GiNT
A. nidulans      92  PLCDRFGPRLVFIGLLLVGSIPTAMAGLVTSPQGLIALRFFI GILGGTFVPCQVWCTGFF
S. lycopersicum 120 AVCDLLGPRYGC AFLIMLSAPT VFCMSFVSSAGGYVAVRFMI GFSLATFVSCQYWMSTMF
      ::*:***: .***.** * : : *

GiNT
A. nidulans     152  DKSIVGTANSLAAGLGNAGGGITYFVMPAIFDSLIRDQGLPAHKAWRVAYIVPFLIVAA
S. lycopersicum 180 NSKIIGLVNGTAAAGWGNMGGGATQLIMPLL YDIIR-RAGATPFTAWRIAFPIPGWLHVVM
      .....* .*. .*. ** *. * . : ** : : : * . . : *** * . : * : ..

GiNT
A. nidulans     212  ALGMLFTCDDTPTGKWSERHIWMKEDTQTASKGNIVDLSSGAQSSRPSGPPSIIAYAIPD
S. lycopersicum 239 GILVLT LGQDLPDGNRG-----TLQKTGTVAKDKFGN-----
      . : * : * * . . . : : : :

GiNT
A. nidulans     272  VEKKGTTETPLEPQSQAIGQFD AFRANAVASPSRKEAFNVI FS LATMAVAVPYACSGSEL
S. lycopersicum 271 -----ILWYAATNYRTWIFVL LYGYSMGVEL
      : . . . . * . * : * **

GiNT
A. nidulans     332  AINSILGDYYDKNFPYMGQTQTGKWAAMFGFLNIVCRPAGGF LADFLYRKTNTPWAKKLL
S. lycopersicum 297 STDNVIAEYFFDRFDLKLSTAGIIAATFGMANLLARPFGGFSSDYAAKKFG--MRGRLW
      : : : : . : : * : : * . * : : * : : * : : * : : * : : * : : *

GiNT
A. nidulans     392  LSFLGVVMGAFMIAMGFSDPKSEATMFG LTAGLAFFLESCNGAIFSLVPHVHPYANGIVS
S. lycopersicum 354 VLWILQTLGGVFCVLLGRS-NSLPLAVTFMILFSIGAQAACGATFGIIPFISRRSLGIIIS
      : : : : : . . . : : : : : * : * : * : : * : *

GiNT
A. nidulans     452  GMVGGFGN LG-GIIFAIIFRYSHHDYARGI WILGVISMVFI SVSWVRPVPKSQMRE---
S. lycopersicum 413 GMTGAGGNFGSLTQLLFPTS SKYSTATGLTYMGFMII GCTLPVTFCHFPQWGSMLPPT
      * : . * . * : * : * . . : * . : : . :

GiNT
A. nidulans
S. lycopersicum 473  KDPVKGTEEHYYTSEYTEAERQKGMHQNSLKFAENCRSERGKRVGSAPTPNLTPNRV

```

**Figure S1.** Amino acid alignment of *GiNT* with nitrate transporters from *Aspergillus nidulans* (XP\_658612.1) and *Solanum lycopersicum* (AAF00053.1).



```

GiGluS      1  -----LQNSRYISAKDKNVIVIGGGDTGDCD IG
A. clavatus 1857 ARDLKVHGREL DGVHFMQFLHRNTKSLLD SGLADGEYISAKDKHV VVIGGGDTGNDC IG
B. fuckeliana 1820 ARDLP IKNRSLEGIHFAMQFLHRNTKSLLD SELADDEYISAKGKHV VVIGGGDTGNDC IG
                               * :..*****.*:*:***** ****

GiGluS      29  TSIRHGAKS IVNFELLP QPPNTRADD NPWP TFPRTFKVDYGHAEV I SHYGKDPRE YNILS
A. clavatus 1917 TSVRHGAKS VVNFELLP QPPPERARD NPWP QWPRI YRV DYGHSEVK THMGKDPRE YCVMS
B. fuckeliana 1880 TSVRHGAKS VTNFELLP QPPNQ RARD NPWP QWPRV YRV DYGHT EVKQHMGKDPRE YCVMS
                               **:*****:..***** ** ***** :** :*****:** * ***** ::*

GiGluS      89  KSFVSDGNGRVAGI NTVRVEWTKDPV TGKWSMGEIEGSEQFF PADL ILLAL GFLGPEEKL
A. clavatus 1977 TEFVDDGNGHV KGINTVRVEWTKS-ASGGWDMKTVEGSEQFF PAELVLLSMGFLGPEDRL
B. fuckeliana 1940 EEFVDDGTGKVKGIN TI RVEWTKS-STGGWDMKKIEGSEQFF PADLVLLSMGFLGPEDRV
                               .**.*.*:* * ****:*****. :* *.* :***:*****:*:**:*****:..

GiGluS      149  INSLGLKTDARTNI ETROGKYSTAIPGVFAAGDCRRGQSLIVWGINEGRQAAREIDQYLM
A. clavatus 2036 LG-DE IERDARKNVKTP PGHYSTNVSGVFAAGDCRRGQSLIVWGINEGRQCAREVDSFLM
B. fuckeliana 1999 LG-DNIEKDGRKNVKTAPGKYSTNVEGIFAAGDCRRGQSLIVWGINEGRQCARECDRFLE
                               :.  :: *.*.*:* * :*** : :*****.*** * :*

GiGluS      209  G-NTNLPVTGGISKFEAPQVHQAPLQMAIR-----
A. clavatus 2095 NTSSSLPVTGGIVRRPAIDMVLHAAEQTVIA-----
B. fuckeliana 2058 G-STSLPVTGGIVKSSASEILARGPHREILGRAERAPIQVVAAT
                               . :..***** : * :: . :

```

**Figure S3.** Amino acid alignment of *GiGluS* with NADH dependent glutamate synthases from *Aspergillus clavatus* (XP\_001269425.1) and *Botryotinia fuckeliana* (XP\_001547433.1). Amino acids shaded in grey represent conserved residues.

```

GiCPS -----
A. clavatus 1 -----MFARFCKAIPAKGRAFFSVNASIQSRLMATVRNQRVPPERATF
F. graminearum 1 MFSRLASFANPAAKSAASAGRTMLQVRYLSEKAVAGSKGRAMPFSAVRATAPAAASLPATL

GiCPS 1 -----MVSQG
A. clavatus 44 TIRDGPFIHFGKSEFGARTNISGEAVFTTSLVGYPESLTDPSYRGQILVFTQPLIGNYGVPS
F. graminearum 61 TIRDGPVVFQ GKAFGANANISGEAVFTTSLVGYPE SMTDPSYRGQILVFTQPLIGNYGVPS

GiCPS 6 FLRTRYGLLKYFESDRIOCEAIVVNDYATRYSHWTAVESLGEWC SRHGVP AITGVDTRA I
A. clavatus 104 AERDQHGLLKYFESPHLQAA GVVVADVAEQYSHWTAVESLGEWCAREGVPAISGVDTRA I
F. graminearum 121 AARDEFNLLKYFESPHVQCAGIVVSDVAVNYSHWTAVESLGEWCAREGVPAISGVDTRA I
      * ..***** ::* . ::* * * .*****:*.*****:*****

GiCPS 66 VHILRDQGSTLSKLI VGDDAANENFNKIPYTDPNTRNLVSEVSTAVPVSYN-PYGD I KIA
A. clavatus 164 VTYLREQSSSLARITV GEEYDAD--QDEAFTDPEQIHLVRQVSTKAPFHVSAADPQC HVA
F. graminearum 181 VTHLREQSSSLARISIGEEYDAD--EDEGFVDPGQINLVKRVTTKAPFVVE SPGASL HVA
      * **:***:*::: :*: : : :** :** :*:* . . . :*:

      Arginine biosynthetic enzyme- and glutamine amidotransferase type 1 domain
GiCPS 125 VVDCGVKHNILRSLV KRGA AVTVLPWNFD FNKISDQFDGIF ISNGPGNPMKAME TVSNLR
A. clavatus 222 VIDCGVKENILRSLVSRGASITVFPFDYP IHKVAHFDGVP ISNGPGDPHQCDDTTYHLR
F. graminearum 239 LIDCGVKENILRSLVSRGASITVFPYDYP IHKVSQHF DGVP ISNGPGDPHQCQATVHMLA
      :*:*:*.*.*.*.*.*.*.*.*.*.*.*.*.*.*.*.*.*.*.*.*.*.*.*.*.*.*.*

GiCPS 185 KAMNSYKRPMFGICMG NLLMGMAAGLDVRKL RFGNRAHNVPALNMVNGK CQITSQNHGYA
A. clavatus 282 RLMETSQVPIFGICLGHQLLALAA GARTIKLKYGNRAHNIPALDMSTGRCHITSQNHGYA
F. graminearum 299 RLMETSNIPIMGICLGHQLLALAVGARTIKLKYGNRAHNIPALDLTTGLCHITSQNHGYA
      : *:: : *::***:* :*::*.* . **::*****:***:: . * *::*****

GiCPS 245 LVDDKFPSPWKKYVNVNDGSNEGI IHKTLPYRSVQFHPEAKGGPEDTEFLFDEFIDQIR
A. clavatus 342 VDVDTLPSDWKPYFVNLNDS SNEGMIHKSRIFS TQFHPEAKGGPLDSSYLFDIYIDSVR
F. graminearum 359 IDASTLPSDFKEYFVNLNDGSNEGMLHKTRPIFS TQFHPEAKGGPMDSSYLFDKYLQNVQ
      : ..:*..:* *:*:*.*.*.*.*.*.*.*.*.*.*.*.*.*.*.*.*.*.*.*.*.*.*.*

GiCPS 305 SEVK-----REGTKFFVPE TIDHRTAQVA-----
A. clavatus 402 KYKANQAA FHPQRDSIPSPLLVDLLAKERVGVQPTIGMQNVQAAAAAAAVAAAA
F. graminearum 419 LAKSNQVVFKNR---PTPLMLDIMS RERVGVETPLAASA-----
      * : :. * * ..

```

**Figure S4.** Amino acid alignment of *GiCPS* with other available *CPS* sequences from *Aspergillus clavatus* (XP\_001274012.1) and *Fusarium graminearum* (XP\_389730). Amino acids shaded in grey represent signature sequences.





```

GiAL -----
S. pombe 1 ----MASSQKLWGGFRFTGATDPLMTAYNESIHYDKRMFNADIDGSKAYAKALEQRGIIIS
A. clavatus 1 MSASKAVAENMLWGGFRFTQGLDPLMVQYNQSLPYDRIFWKQDIAGSIAFARANAKTGILT

GiAL -----
S. pombe 56 ADELKMLDGL EAVRDEWKTNKF TLQPSDEDIHTANERRLGEIIGTGIAGKLHTGRSRND
A. clavatus 61 QQEFTEIERGFKQIAD EWS TNTFVVKENDEDIHTANERRLSEIIGKEIGGKLHTGRSRNE

GiAL -----
S. pombe 116 QVTTDMRLWLRDEL DI IQKSLVGLLQVFFVARAESDLDIIMPGYTHLQRAQPIRWSHFLLS
A. clavatus 121 QIATDMRLWLRDEL RKLDAVLCDLVKVSIARAESELDIIMPGYTHLQKAQPVWRWSHWLLS

GiAL 1 ----MERRWGRRLTHIFDRLNVIPLGSGAVAGNPFNIDREFLAKELGFKGVIHNSLLGVSD
S. pombe 176 HAFSILNDLDRKQIYSRVNRLPLGAGALAGNPFVAVDRKFLQKELGFEGVIMNSMNAVAD
A. clavatus 181 HATAFASELQRLREVTKRVNRSPLGTGALAGNPFQIDREAMAQELGFEGLLYNSMNAVAD
      :      * * . : . : * * * * * : * * : : * * * * * : * * : . * : *
                                     C3 region
GiAL 57 RDFVAEILFWS SLTMIHISRFSEDLILYSTSEFGFVTLADAYSTGSSLMPQKKNPDSLEL
S. pombe 236 RDYVIEFMFWASVMTHISRLAEDLIIYSTSEFNFVTLSDAYSTGSSIMPQKKNPDSLEL
A. clavatus 241 RDFAMETMQWGS SFMLKISRWAEDLIIYSSLEFGFVRLSDAYSTGSSLMPQKKNADSELEL
      * * : . * : * . * * : * * * : * * * * * : * * . * * : * * * * * : * * * * *

GiAL 117 LRGKSGRVFGQLSGFLMTYKGLPSTYNKDLQEDKEPIFDA TD T LSGSLQITTVLSTLTI
S. pombe 286 LRGKSGRVFGNMMGFMVSVKGIPSTYNKDLQEDKEPLFDS S KTVLDSIQILTGVLSTLTV
A. clavatus 301 LRGKAGRAFGHMAGLMVTIKGLPTTYNKDLQESVEPLLDHIKTVSDSIQIATGVLSTLTV
      * * * * * : * * . * * : : * : : : * * : * * * * * . * * : * . * : . * : * * * * * :

GiAL 177 YPERMKQSLSTDMLATDLAEYLVRKGVPFRETHHIAGAAVRLAEDRNTS SMSNL TLED FKO
S. pombe 346 NPENIAKSLTADMLATDLAEYLVRKGVPFRETHHISGSAVRMAEERNTTIDKLSVEDFKS
A. clavatus 361 LPEKMTAALAPEMLATEIADYLVRKGVPFREGHHISGRVVALAEKNNVPMDTLSLEQLKT
      * * . : : * * . : * * * * * : * * : * * * * * * * * * * * * * * * * * * * * * * * *

GiAL 237 LHQAFEDDVKL IWDYEKSIENRCSLGGTSKQTVKEQIKLSKWLNE
S. pombe 406 LHPLYEEDVADVFNYESVVEKRC AIGGTAKSCVLEQIQTIKKALE-
A. clavatus 421 VDA R FDEDDVQA CLDYERAVELKDAIGGTSRRAVLEQTAVLKKLL--
      : . : : * * : * * : * * : : * * * * * : * * * : . * *

```

**Figure S6.** Amino acid alignment of *GiAL* with the argininosuccinate lyases (*AL*) from *Aspergillus clavatus* (XP\_001270795.1) and from *Schizosaccharomyces pombe* (NP\_596817.1). Amino acids shaded in grey represent conserved residues.

```

GiCAR1      1  -----MAYKFVEKKVGIIGCPFNMGQHRNMGVERGPKRLMEYGL IEQLEEL
L.bicolor   1  -----MASHSRFIREPKTVAVGCPFSGGQPK-PGVDKGP IHLVEAGL ISQFEGL
A.bisporus  1  -----MPSLQFLPQPLTAAIVGCPFSGGQRR-TGVDQGP IRLVEAGLVEQLKGL
S.pombe     1  MSPHKIP EVHRH IMS SRYMEGNAVS I INMFPSGGQPK-DGAELAPEMIEAAGL PEDLERL
          ..*:. **.*** : *.: .* : ** :.: *

GiCAR1      47  EWSVEFD GHHKL NEL RPSED PNI GKLK PLYVS RVAETVS KAVE SHLKR QVALTL GGDH
L.bicolor   50  GWNVVFEGHHQF EDI KTNDDPPV G ILKNPKLVS RVTESIAKVVG EHVKN GELAVTL GGDH
A.bisporus  49  GWNVVFED GHHQF E EYNMLD DAPIG IMKNPRTVS QVNR SVA GVVMMHAKNGMLP VTL GGDH
S.pombe     60  GYSVNVVQNF KF KSRPLKE GPNQALMKN PLYVS NVTRQVRNIVQQE LEKQRIAVNI GGDH
          :.* . : :.:. . . :.* **.* . : * .. . :.:.*****

GiCAR1      107 SLALGTVSGTLSVYP DACL IWVDAHAD I NTPETTKS GNLHGCPV SFLLG IAG-KVP GF EW
L.bicolor   110 SLAMGTI SGTLS THPEACV IWVDAHAD I NTIES TGS GNIHGMPV SFLLG LGS-KVPEFSW
A.bisporus  109 SLAMGTI SGTSLAVHP DACV IWIDAHAD I NTIETDS GNMHGMPL SFLLG IGD-KIQEFDW
S.pombe     120 SLAIGTVEGVQAVYD DACVLWIDAHAD I NTPDSSPS KNLHGCP LSPSLG YAEPLPE EFAW
          ***:***.* :.: :***:***:***** :.: * **:* *:* ** * . * *

GiCAR1      166  INKILSP DRIVY IGLRDVEASEKK ILKQLG IKA FMSHEVD KYGI GKVVEMALD AVNPKRD
L.bicolor   169  VKPLLKPEMLVY IGLRDVDAGEKA ILRD NKIKAFMSHEVD RYGI GKVVEMALD HVNPNRD
A.bisporus  168  IKPVLKPERLVY IGLRDLDAGEKRLLE HNIKAFMSHEVD KYGI GKVVEMALD YVNPKRD
S.pombe     180  TRRVIEH RRLAF IGLRDLD PMERAF LRE RSITA YTMHDVD KYGI ARVVEMALE HINPGRR
          . :. :.:.*****. * : :.: **:* **:* **:* ** * . * *

          Arginase family signature
GiCAR1      226  LPIHLSF DVDAL DPTVAPS TGTPV RGLLTFREGHYI CEAVHETG CLVSV DMMEVA I PDPE
L.bicolor   229  RPIHLSF DVDAL DPTVAPS TGTPV RGLLTFREGHFICEAI YETGLLVAL DLMEVNP ---
A.bisporus  228  LPIHLSF DVDAL DPSVAPS TGTPV RGLLTFREGHYICEAI HETGLLVAL DLMEVNP ---
S.pombe     240  RPIHLSF DVDACDPIVAPA TGTRV PGLLTFREAMYI CESVAETG SLVAV DVMEVNP ---
          ***** ** **:* ** * ***** . :***: : ** * :.:***

GiCAR1      286  IFPDIDE TQIFATVTVGLSLVRCC FGETLL
L.bicolor   285  --SLEDEASVKQTVAVGCSLLRSGLGETLL
A.bisporus  284  --SLAEAADAKTVAVGCSLVRAALGETLL
S.pombe     296  --LLGNKEEAKTTVDLARS IVRTCLGQTLL
          : . ** .. *:* * ::* **

```

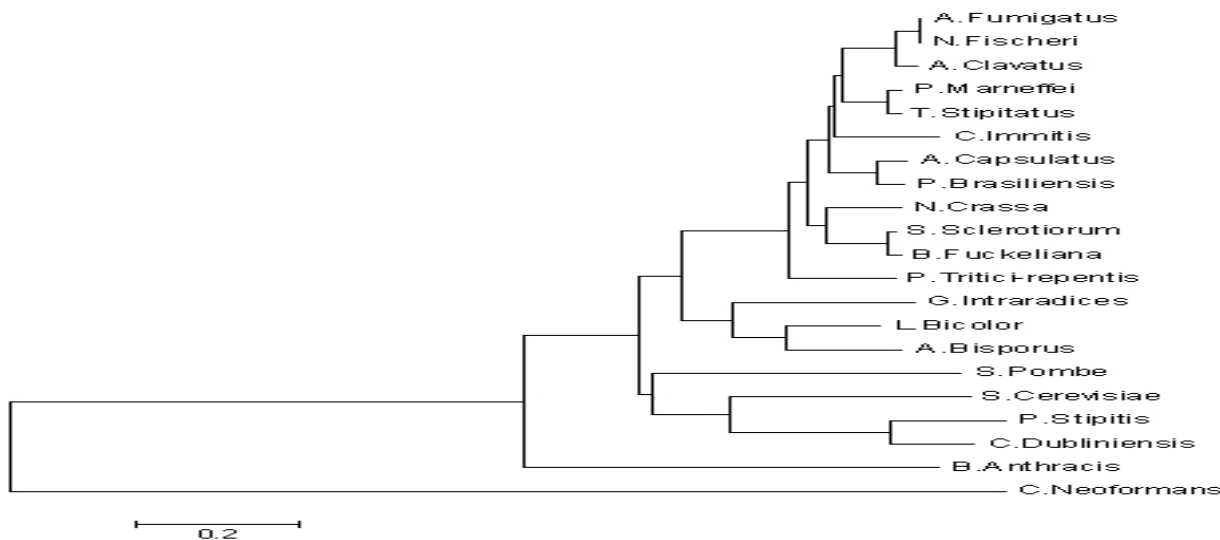

**Figure S7.** Amino acid alignment and phylogenetic analysis for *GiCAR1*. **A**, The alignment of the *GiCAR1* with the reported arginase from *Laccaria bicolor*, *Agaricus bisporus* and *Schizosaccharomyces pombe*. Amino acids shaded in grey represent conserved residues. **B**, Phylogenetic relationship among fungal arginase. The sequence of *Cryptococcus neoformans* was used as an outgroup; branches are drawn to scale (the scale bar corresponds to 0.2 changes per site). The accession numbers of the sequences used in the alignment are: XP\_001875445 (*Laccaria bicolor*); CAG26693 (*Agaricus bisporus*); AAW44454 (*Cryptococcus neoformans*); NP\_595133 (*Schizosaccharomyces pombe*); XP\_001542989 (*Actinobacillus capsulatus*); XP\_001941966 (*Pyrenophora tritici-repentis*); XP\_001588035 (*Sclerotinia sclerotiorum*); XP\_001556008 (*Botryotinia fuckeliana*); XP\_002143546 (*Penicillium marneffei*); EED19435 (*Talaromyces stipitatus*); XP\_959759 (*Neurospora crassa*); XP\_754476 (*Aspergillus fumigatus*); XP\_001244242 (*Coccidioides immitis*); XP\_001271144 (*Aspergillus clavatus*); XP\_001263320 (*Neosartorya fischeri*); XP\_001385197 (*Pichia stipitis*); EDV11110 (*Saccharomyces cerevisiae*); CAX41791 (*Candida dubliniensis*); EEH39780 (*Pteronura brasiliensis*); NP\_842720 (*Bacillus anthracis str. Ames*).









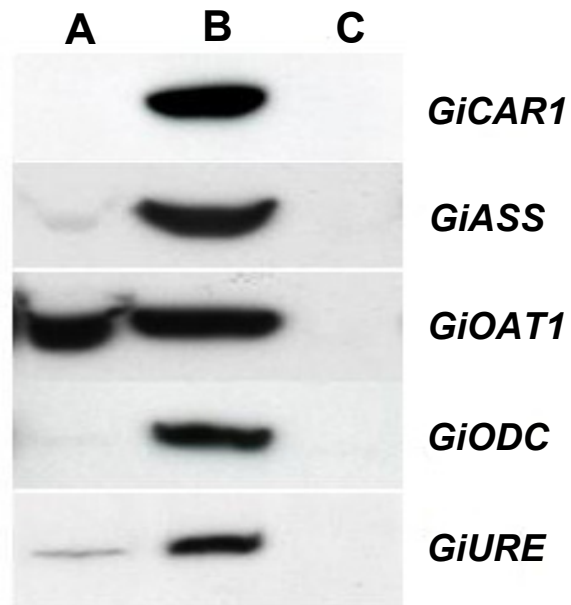

**Figure S11. Western blot of the expressed proteins in yeast.** Whole-cell protein extracts from the yeast transformed with Gi genes were fractionated on a denaturing 12% polyacrylamide gel, transferred to polyvinylidene fluoride (PVDF) membranes and detected with Anti-His(C-term)-HRP antibody. The yeast knockout mutants were independently transformed with the empty pYES2.1 vector or the vector fused with *GiCAR1*, *GiASS*, *GiOAT1*, *GiODC* and *GiURE*. **a**, The expression of the Gi genes without the induction of galactose; **b**, The expression of the Gi genes with the induction of galactose; **c**, The expression of the empty vector with the induction of galactose (as the negative control).

### Supplementary Table S1. Primers for gene cloning

| Gene          | Forward (5'- 3')             | Reverse (5'- 3')                  |
|---------------|------------------------------|-----------------------------------|
| <i>GiASS</i>  | ATGTCACAAGGTCGCGTTCTTCTCG    | TAAATTGTTGCCAAAAGCAGTTTCTCC       |
| <i>GiCAR1</i> | GTA ACTA ACTCTATAAAGATGGCC   | TAACAAAGTTTCACCGAAACAACA          |
| <i>GiGS1</i>  | TTAAATCTGAAAGATGTATAACAA     | TGCAAGTGAAGACTCAACAATAAT          |
| <i>GiGS2</i>  | AAACATTAATAACGAAAATGGCTTTTAT | ACCAAGAGAAGATTCAACGATGATC         |
| <i>GiOAT1</i> | ATGTCAACTCAACTTAGTCAAAAAG    | ATCATCGCAAAACTGATCA               |
| <i>GiODC</i>  | ATGAAGGGGCCTACGAATCAGC       | TGTAACATCATAGAGATAATCAAAAACATGAGG |
| <i>GiURE</i>  | ATGAGGTTAGTACCGAGAGAATTA     | AAACAAGTAAACCGTTTGAGTTAAAGG       |

## Supplementary Table S2. Yeast strains for functional complementation

| Yeast knockout mutant                                                          | Corresponding parent line                                     | Source of the strain                                       |
|--------------------------------------------------------------------------------|---------------------------------------------------------------|------------------------------------------------------------|
| Haploid $\Delta$ GLN1 (MATa, his3D1, leu2D0, met15D0, ura3D0, YPR035w::kanMX4) | YPR035W (MATa, his3D1, leu2D0, ura3D0, $\Delta$ GLN1::kanMX4) | Made from diploid YPR035W by sporulation                   |
| YPR035W (MATa, his3D1, leu2D0, ura3D0, $\Delta$ GLN1::kanMX4)                  | BY4743 (MATa, his3, leu2, ura3)                               | Open Biosystem, USA                                        |
| YOL058W (MATa, his3, leu2, lys2, ura3, ARG1 $\Delta$ ::kanMX4))                | BY4742 (MATa, his3, leu2, lys2, ura3)                         | Open Biosystem, USA                                        |
| YKL184W (MATa, his3, leu2, lys2, ura3, SPE1 $\Delta$ ::kanMX4)                 | BY4742 (MATa, his3, leu2, lys2, ura3)                         | Open Biosystem, USA                                        |
| YBR208C (MATa, his3, leu2, lys2, ura3, Dur1,2 $\Delta$ ::kanMX4)               | BY4742 (MATa, his3, leu2, lys2, ura3)                         | Open Biosystem, USA                                        |
| O2463d $\Delta$ ARG81 (leu2, ura3)                                             | O2463d                                                        | Evelyne Dubois, Universite <sup>ˆ</sup> Libre de Bruxelles |
| 12T7cI ura3, $\Delta$ CAR1                                                     | 2T7cI ura3                                                    | Evelyne Dubois, Universite <sup>ˆ</sup> Libre de Bruxelles |



### Supplementary Table 3 Primers for real time PCR

| Gene          | Forward (5'- 3')          | Reverse (5'- 3')            |
|---------------|---------------------------|-----------------------------|
| <i>DcGS</i>   | GGATGGCCAAATGGAGGATT      | TGTCGGCACCAATACCACAGT       |
| <i>DcEAF</i>  | AGGATGATCCCGCCAAAGAG      | CCAGGGTGGTTCATGATGATAA      |
| <i>GiAL</i>   | ACGGACTTGGCTGAATATTTGGT   | GCCCCTGCAATATGATGAGTTT      |
| <i>GiASS</i>  | GCATTGGTCGTATTGATATTGTTGA | TTGTTCCCCCAGGAGTTTCA        |
| <i>GiCARI</i> | TGATGCGGTGAATCCTAAGAGA    | GATCAAGTGCATCAACGTCAAAG     |
| <i>GiCPS</i>  | GATCGCCGTCGTTGACTGT       | CGCGCCGCGTTTAACTAA          |
| <i>GiGS1</i>  | AGTGGCCTTCGTTCAAAGACTAG   | CATCACCAGGTGCTTGATTAGTA     |
| <i>GiGS2</i>  | CCAACATTGATCCTTATCGTGTC   | CTCCTAAATTAGAGAAAGAAAAAAGGG |
| <i>GiGluS</i> | TTCGCAGCCGGTGATTG         | CGACCCTCATTTATACCCCATACA    |
| <i>GiNT</i>   | GGCTTGCTGCGGTTTCAGT       | CGACTAATCCTGATATTGCACCAA    |
| <i>GiOAT1</i> | GGTTCGAGCGGATATTGTCATAC   | AGGACTGCTGATATTGGGTAAACG    |
| <i>GiOAT2</i> | CGGGTAAGATGCTTTGTCAAGA    | GCCTGAAAGTGCTTTACCAAGTATAAC |
| <i>GiODC</i>  | TTGATTGCGTTACCAAAAATGG    | TCGAAATACAACCAGTCACCAAGA    |
| <i>GiSR4</i>  | AAGCCGCTACGTGTCGTT        | AACAGGTGGTAGAAATATGGGAAG    |
| <i>GiURE</i>  | CGCAAATGGGAGATGCAAAT      | CAGCACTTGATAATGACCAAAC      |
